# Supplementary material for: Insights into the Intramolecular Properties of η6‐Arene‐Ru‐Based Anticancer Complexes Using Quantum Calculations
Source: Hindawi journal article supplement (doi:10.1155/2013/892052), 2013-01-01
Supplement: f1 [file 892052.f1.docx]

**Supplementary Materials**

Table S1: The QTAIM properties of selected bonds in complex **1**, **2**, **3** and **4** that are associated with metal using 3-21G

| **Complex 1** | | | | | | | | | | | |
| --- | --- | --- | --- | --- | --- | --- | --- | --- | --- | --- | --- |
|  | r | r |  | K | BPL-GBL_I | V | G | L | GBL_I | Ven | |V/G| |
| Ru1 - P11 | 0.090 | 0.150 | 0.104 | 0.027 | 0.008 | -0.091 | 0.065 | -0.038 | 4.408 | -7.737 | 1.418 |
| Ru1 - C2 | 0.075 | 0.268 | 0.240 | 0.011 | 0.014 | -0.089 | 0.078 | -0.067 | 4.186 | -12.842 | 1.140 |
| Ru1 - C4 | 0.074 | 0.285 | 0.543 | 0.010 | 0.019 | -0.091 | 0.081 | -0.071 | 4.198 | -13.801 | 1.121 |
| Ru1 - C7 | 0.074 | 0.285 | 0.544 | 0.010 | 0.019 | -0.091 | 0.081 | -0.071 | 4.198 | -13.803 | 1.121 |
| Ru1 - C9 | 0.075 | 0.268 | 0.240 | 0.011 | 0.014 | -0.089 | 0.078 | -0.067 | 4.186 | -12.841 | 1.140 |
| Ru1 - Cl5 | 0.063 | 0.206 | 0.167 | 0.007 | 0.001 | -0.065 | 0.058 | -0.051 | 4.616 | -10.030 | 1.117 |
| Ru1 - Cl17 | 0.063 | 0.206 | 0.167 | 0.007 | 0.001 | -0.065 | 0.058 | -0.051 | 4.616 | -10.030 | 1.117 |
| **Complex 2** | | | | | | | | | | | |
| Ru1 - P11 | 0.086 | 0.136 | 0.101 | 0.025 | 0.003 | -0.083 | 0.059 | -0.034 | 4.463 | -6.746 | 1.422 |
| Ru1 - C6 | 0.071 | 0.284 | 2.624 | 0.007 | 0.048 | -0.086 | 0.078 | -0.071 | 4.240 | -13.389 | 1.094 |
| Ru1 - C7 | 0.074 | 0.248 | 0.168 | 0.011 | 0.015 | -0.084 | 0.073 | -0.062 | 4.212 | -11.473 | 1.148 |
| Ru1 - C9 | 0.079 | 0.270 | 0.295 | 0.012 | 0.014 | -0.092 | 0.080 | -0.068 | 4.160 | -12.885 | 1.155 |
| Ru1 - C17 | 0.079 | 0.273 | 0.178 | 0.013 | 0.018 | -0.094 | 0.081 | -0.068 | 4.133 | -12.968 | 1.156 |
| Ru1 - O8 | 0.059 | 0.295 | 0.349 | 0.007 | 0.005 | -0.087 | 0.081 | -0.074 | 4.260 | -13.772 | 1.086 |
| Ru1 - Cl19 | 0.066 | 0.212 | 0.220 | 0.008 | 0.004 | -0.070 | 0.061 | -0.053 | 4.579 | -10.127 | 1.136 |
| **Complex 3** | | | | | | | | | | | |
| Ru1 - P13 | 0.088 | 0.154 | 0.110 | 0.026 | 0.009 | -0.090 | 0.064 | -0.039 | 4.424 | -8.486 | 1.400 |
| Ru1 - C6 | 0.071 | 0.274 | 1.012 | 0.008 | 0.023 | -0.085 | 0.077 | -0.068 | 4.254 | -14.381 | 1.107 |
| Ru1 - C9 | 0.075 | 0.283 | 0.394 | 0.010 | 0.018 | -0.092 | 0.081 | -0.071 | 4.187 | -14.913 | 1.128 |
| Ru1 - C10 | 0.076 | 0.272 | 0.183 | 0.011 | 0.014 | -0.090 | 0.079 | -0.068 | 4.173 | -14.209 | 1.143 |
| Ru1 - C14 | 0.075 | 0.262 | 0.276 | 0.011 | 0.013 | -0.088 | 0.077 | -0.066 | 4.188 | -13.769 | 1.145 |
| Ru1 - Cl19 | 0.061 | 0.205 | 0.192 | 0.006 | 0.001 | -0.064 | 0.057 | -0.051 | 4.632 | -10.728 | 1.110 |
| Ru1 - Cl20 | 0.062 | 0.206 | 0.154 | 0.006 | 0.001 | -0.065 | 0.058 | -0.052 | 4.624 | -10.861 | 1.112 |
| **Complex 4** | | | | | | | | | | | |
| Ru1 - P12 | 0.084 | 0.142 | 0.103 | 0.024 | 0.004 | -0.083 | 0.059 | -0.036 | 4.475 | -7.569 | 1.400 |
| Ru1 - C6 | 0.076 | 0.266 | 0.372 | 0.011 | 0.012 | -0.088 | 0.077 | -0.066 | 4.199 | -13.683 | 1.142 |
| Ru1 - C11 | 0.072 | 0.276 | 1.018 | 0.009 | 0.024 | -0.087 | 0.078 | -0.069 | 4.223 | -14.275 | 1.113 |
| Ru1 - C10 | 0.071 | 0.267 | 0.592 | 0.009 | 0.023 | -0.084 | 0.075 | -0.067 | 4.231 | -13.640 | 1.116 |
| Ru1 - C19 | 0.082 | 0.257 | 0.090 | 0.015 | 0.012 | -0.093 | 0.079 | -0.064 | 4.123 | -13.179 | 1.186 |
| Ru1 - O16 | 0.059 | 0.289 | 0.350 | 0.007 | 0.005 | -0.086 | 0.079 | -0.072 | 4.268 | -14.667 | 1.089 |
| Ru1 - Cl23 | 0.064 | 0.211 | 0.230 | 0.007 | 0.004 | -0.068 | 0.060 | -0.053 | 4.605 | -10.815 | 1.123 |

Table S2: The correlation in the properties of the electron density critical point analysis of complexes **1**, **2**, **3** and **4**

|  | **Complex 1** | | | | **Complex 2** | | | | **Complex 3** | | | | **Complex 4** | | | |
| --- | --- | --- | --- | --- | --- | --- | --- | --- | --- | --- | --- | --- | --- | --- | --- | --- |
|  | r | r |  | Ven | r | r |  | Ven | r | r |  | Ven | r | r |  | Ven |
| r | 1.00 | -0.94 | -0.72 | 0.95 | 1.00 | -0.92 | -0.73 | 0.92 | 1.00 | -0.93 | -0.60 | 0.93 | 1.00 | -0.90 | -0.54 | 0.89 |
| r | -0.94 | 1.00 | 0.66 | -0.99 | -0.92 | 1.00 | 0.73 | -0.99 | -0.93 | 1.00 | 0.57 | -0.97 | -0.90 | 1.00 | 0.52 | -0.98 |
| Ellipticity | -0.72 | 0.66 | 1.00 | -0.67 | -0.73 | 0.73 | 1.00 | -0.74 | -0.60 | 0.57 | 1.00 | -0.56 | -0.54 | 0.52 | 1.00 | -0.51 |
| K | 0.99 | -0.96 | -0.72 | 0.98 | 0.94 | -0.97 | -0.71 | 0.98 | 0.98 | -0.96 | -0.60 | 0.96 | 0.94 | -0.97 | -0.52 | 0.97 |
| BPL-GBL_I | -0.63 | 0.44 | 0.80 | -0.43 | -0.58 | 0.44 | 0.52 | -0.44 | -0.64 | 0.49 | 0.46 | -0.47 | -0.66 | 0.47 | 0.62 | -0.45 |
| V | -0.96 | 0.86 | 0.72 | -0.90 | -0.91 | 0.89 | 0.66 | -0.92 | -0.95 | 0.85 | 0.58 | -0.88 | -0.93 | 0.90 | 0.49 | -0.92 |
| G | 0.15 | 0.14 | -0.20 | -0.05 | 0.02 | 0.21 | 0.15 | -0.12 | 0.24 | 0.07 | -0.14 | 0.03 | 0.27 | 0.00 | -0.06 | 0.08 |
| L | 0.94 | -1.00 | -0.66 | 0.99 | 0.92 | -1.00 | -0.73 | 0.99 | 0.93 | -1.00 | -0.57 | 0.97 | 0.90 | -1.00 | -0.52 | 0.98 |
| GBL_I | -0.95 | 0.95 | 0.71 | -0.92 | -0.92 | 0.94 | 0.72 | -0.91 | -0.95 | 0.95 | 0.61 | -0.90 | -0.93 | 0.90 | 0.57 | -0.85 |
| Ven | 0.95 | -0.99 | -0.67 | 1.00 | 0.92 | -0.99 | -0.74 | 1.00 | 0.93 | -0.97 | -0.56 | 1.00 | 0.89 | -0.98 | -0.51 | 1.00 |
| |V/G| | 0.73 | -0.87 | -0.54 | 0.80 | 0.71 | -0.83 | -0.64 | 0.77 | 0.76 | -0.89 | -0.50 | 0.81 | 0.78 | -0.87 | -0.45 | 0.80 |

Table S3: Selected atomic properties derived through QTAIM analysis for complex **1**, **2**, **3** and **4** using 3-21G

| **Complex 1** | | | | | | | | | | | | | | | |
| --- | --- | --- | --- | --- | --- | --- | --- | --- | --- | --- | --- | --- | --- | --- | --- |
|  | **q(A)** | **L(A)** | **K(A)** | **KScaled(A)** | **Ee(A)** | Intra(A)| | Bond(A)| | (A)| | N(A) | (A) | **%(A)** | **(A,A')** | **(A,A')** | Vol(A) | ZZ(A) |
| Ru1 | 0.61 | 3.10E-04 | 4402.72 | -4423.80 | -4402.72 | 0.38 | 1.88 | 1.91 | 43.39 | 40.79 | 94.00 | 2.60 | 6.00 | 105.51 | -4.67 |
| C2 | -0.10 | -8.90E-05 | 37.61 | -37.79 | -37.61 | 0.25 | 0.22 | 0.09 | 6.10 | 4.02 | 65.90 | 2.08 | 34.10 | 74.18 | -10.60 |
| C3 | -0.09 | 1.04E-04 | 37.59 | -37.77 | -37.59 | 0.25 | 0.21 | 0.11 | 6.09 | 4.02 | 66.00 | 2.07 | 34.00 | 76.48 | -6.91 |
| C4 | -0.12 | -7.80E-05 | 37.60 | -37.78 | -37.60 | 0.23 | 0.14 | 0.10 | 6.12 | 4.04 | 65.93 | 2.09 | 34.07 | 76.04 | -10.63 |
| C6 | -0.09 | -2.70E-05 | 37.59 | -37.77 | -37.59 | 0.26 | 0.21 | 0.11 | 6.09 | 4.02 | 66.00 | 2.07 | 34.00 | 76.53 | -6.91 |
| C7 | -0.13 | -1.41E-04 | 37.60 | -37.78 | -37.60 | 0.23 | 0.14 | 0.10 | 6.13 | 4.04 | 65.93 | 2.09 | 34.07 | 75.99 | -10.62 |
| C9 | -0.10 | -9.70E-05 | 37.61 | -37.79 | -37.61 | 0.25 | 0.22 | 0.09 | 6.10 | 4.02 | 65.90 | 2.08 | 34.10 | 74.21 | -10.61 |
| P11 | 1.19 | -8.00E-04 | 337.98 | -339.60 | -337.98 | 1.14 | 0.36 | 1.50 | 13.81 | 11.80 | 85.50 | 2.00 | 14.50 | 85.10 | -14.91 |
| Cl5 | -0.55 | 9.60E-05 | 456.65 | -458.84 | -456.65 | 0.17 | 1.31 | 1.48 | 17.55 | 16.95 | 96.56 | 0.60 | 3.44 | 232.43 | -25.33 |
| Cl17 | -0.55 | 9.40E-05 | 456.65 | -458.84 | -456.65 | 0.17 | 1.31 | 1.48 | 17.55 | 16.95 | 96.56 | 0.60 | 3.44 | 232.40 | -25.33 |
| **Complex 2** | | | | | | | | | | | | | | | |
| Ru1 | 0.66 | 3.18E-04 | 4402.63 | -4424.53 | -4402.63 | 0.31 | 0.90 | 0.99 | 43.34 | 40.84 | 94.23 | 2.50 | 5.77 | 107.70 | -3.04 |
| C6 | -0.10 | 1.16E-04 | 37.59 | -37.78 | -37.59 | 0.27 | 0.15 | 0.12 | 6.10 | 4.02 | 66.00 | 2.07 | 34.00 | 76.51 | -11.14 |
| C7 | -0.12 | -3.12E-04 | 37.61 | -37.80 | -37.61 | 0.22 | 0.13 | 0.10 | 6.12 | 4.04 | 66.06 | 2.08 | 33.94 | 75.90 | -11.82 |
| C9 | -0.12 | -3.15E-04 | 37.62 | -37.80 | -37.62 | 0.22 | 0.13 | 0.13 | 6.12 | 4.03 | 65.96 | 2.08 | 34.04 | 73.77 | -10.11 |
| C14 | -0.10 | 1.39E-04 | 37.59 | -37.77 | -37.59 | 0.26 | 0.16 | 0.12 | 6.10 | 4.03 | 66.12 | 2.07 | 33.88 | 79.17 | -7.57 |
| C17 | -0.10 | -2.73E-04 | 37.61 | -37.80 | -37.61 | 0.26 | 0.18 | 0.11 | 6.10 | 4.03 | 66.01 | 2.07 | 33.99 | 74.92 | -10.53 |
| C18 | -0.07 | 8.10E-05 | 37.59 | -37.78 | -37.59 | 0.26 | 0.22 | 0.10 | 6.07 | 4.01 | 66.03 | 2.06 | 33.97 | 75.48 | -7.04 |
| P11 | 1.02 | 1.31E-04 | 338.08 | -339.76 | -338.08 | 1.06 | 0.67 | 0.40 | 13.98 | 11.95 | 85.46 | 2.03 | 14.54 | 93.48 | -14.47 |
| O8 | -0.94 | 1.20E-05 | 74.50 | -74.87 | -74.50 | 0.14 | 0.66 | 0.77 | 8.94 | 7.90 | 88.36 | 1.04 | 11.64 | 100.57 | -11.58 |
| Cl19 | -0.51 | 5.70E-05 | 456.67 | -458.94 | -456.67 | 0.15 | 1.13 | 1.28 | 17.51 | 16.86 | 96.32 | 0.65 | 3.68 | 225.47 | -25.46 |
| **Complex 3** | | | | | | | | | | | | | | | |
| Ru1 | 0.61 | -2.19E-04 | 4402.64 | -4424.27 | -4402.64 | 0.38 | 1.62 | 1.67 | 43.39 | 40.81 | 94.04 | 2.59 | 5.96 | 106.26 | 1.22 |
| C6 | -0.09 | 4.70E-05 | 37.61 | -37.79 | -37.61 | 0.12 | 0.21 | 0.09 | 6.09 | 3.95 | 64.85 | 2.14 | 35.15 | 62.00 | -9.97 |
| C9 | -0.13 | 5.00E-06 | 37.62 | -37.81 | -37.62 | 0.22 | 0.11 | 0.11 | 6.13 | 4.04 | 65.88 | 2.09 | 34.12 | 74.45 | -9.49 |
| C10 | -0.11 | -3.23E-04 | 37.62 | -37.81 | -37.62 | 0.23 | 0.17 | 0.07 | 6.11 | 4.02 | 65.83 | 2.09 | 34.17 | 72.73 | -11.84 |
| C14 | -0.12 | -2.76E-04 | 37.62 | -37.81 | -37.62 | 0.22 | 0.19 | 0.08 | 6.12 | 4.03 | 65.84 | 2.09 | 34.16 | 71.81 | -10.51 |
| C16 | -0.11 | -2.92E-04 | 37.62 | -37.81 | -37.62 | 0.23 | 0.17 | 0.10 | 6.11 | 4.03 | 65.88 | 2.09 | 34.12 | 73.50 | -8.17 |
| C17 | -0.06 | 1.29E-04 | 37.61 | -37.79 | -37.61 | 0.19 | 0.20 | 0.06 | 6.06 | 3.93 | 64.88 | 2.13 | 35.12 | 59.99 | -7.18 |
| P13 | 1.18 | -4.25E-04 | 337.98 | -339.64 | -337.98 | 1.17 | 0.04 | 1.20 | 13.82 | 11.82 | 85.56 | 1.99 | 14.44 | 86.26 | -13.55 |
| Cl19 | -0.56 | 9.90E-05 | 456.64 | -458.89 | -456.64 | 0.18 | 1.34 | 1.51 | 17.56 | 16.96 | 96.55 | 0.61 | 3.45 | 232.12 | -23.71 |
| Cl20 | -0.56 | 8.70E-05 | 456.64 | -458.89 | -456.64 | 0.18 | 0.95 | 1.12 | 17.56 | 16.93 | 96.41 | 0.63 | 3.59 | 227.29 | -28.25 |
| **Complex 4** | | | | | | | | | | | | | | | |
| Ru1 | 0.66 | -9.94E-04 | 4402.56 | -4425.01 | -4402.56 | 0.32 | 0.83 | 0.83 | 43.34 | 40.85 | 94.26 | 2.49 | 5.74 | 108.27 | 13.22 |
| C6 | -0.12 | -1.33E-04 | 37.62 | -37.82 | -37.62 | 0.21 | 0.13 | 0.14 | 6.12 | 4.03 | 65.89 | 2.09 | 34.11 | 72.94 | -9.46 |
| C10 | -0.13 | 2.99E-04 | 37.62 | -37.81 | -37.62 | 0.23 | 0.14 | 0.15 | 6.13 | 4.04 | 65.98 | 2.08 | 34.02 | 74.94 | -11.14 |
| C11 | -0.09 | -1.85E-04 | 37.62 | -37.81 | -37.62 | 0.18 | 0.14 | 0.06 | 6.09 | 3.95 | 64.93 | 2.13 | 35.07 | 61.77 | -10.48 |
| C18 | -0.08 | -7.89E-04 | 37.63 | -37.82 | -37.63 | 0.17 | 0.02 | 0.17 | 6.08 | 3.95 | 64.97 | 2.13 | 35.03 | 59.74 | -7.55 |
| C19 | -0.11 | -1.06E-04 | 37.63 | -37.83 | -37.63 | 0.23 | 0.19 | 0.15 | 6.11 | 4.02 | 65.90 | 2.08 | 34.10 | 71.34 | -12.70 |
| C21 | -0.10 | -1.79E-04 | 37.61 | -37.80 | -37.61 | 0.25 | 0.20 | 0.15 | 6.10 | 4.02 | 65.93 | 2.08 | 34.07 | 75.47 | -8.71 |
| P12 | 1.01 | -1.38E-04 | 338.07 | -339.80 | -338.07 | 1.10 | 0.44 | 0.66 | 13.99 | 11.96 | 85.54 | 2.02 | 14.46 | 94.56 | -13.89 |
| O16 | -0.94 | 3.90E-05 | 74.50 | -74.88 | -74.50 | 0.14 | 0.66 | 0.77 | 8.94 | 7.90 | 88.30 | 1.05 | 11.70 | 100.27 | -12.42 |
| Cl23 | -0.52 | 6.70E-05 | 456.66 | -458.99 | -456.66 | 0.16 | 1.16 | 1.31 | 17.52 | 16.88 | 96.34 | 0.64 | 3.66 | 225.69 | -23.34 |

q(A) is net charge of atom A, L(A) is Lagrangian of Atom A, N(A) is average number of electrons in atom A, K(A) is electronic kinetic energy of atom A (Hamiltonian Form), %(A) is percentage of average number of electrons localized in atom A, %(A,A') is the percentage of electron delocalization index of atom A, KScaled(A) is approximation to virial-based total energy of atom A, Intra(A)| is magnitude of intraatomic dipole moment of atom A, Ee(A) is contribution of atom A to electronic energy of molecule, Vol(A) is the volume bounded by an isosurface of the electron density distribution (0.001) and by interatomic surfaces of atom A and zz= Out of plane magnetizability contribution of atom A.

Table S4: The correlation in the atomic properties of complexes 1, 2, 3 and 4.

|  | **Complex 1** | | | | **Complex 2** | | | | **Complex 3** | | | | **Complex 4** | | | |
| --- | --- | --- | --- | --- | --- | --- | --- | --- | --- | --- | --- | --- | --- | --- | --- | --- |
|  | **K(A)** | **Ee(A)** | **Bond(A)|** | **ZZ(A)** | **K(A)** | **Ee(A)** | **Bond(A)|** | **ZZ(A)** | **K(A)** | **Ee(A)** | **Bond(A)|** | **ZZ(A)** | **K(A)** | **Ee(A)** | **Bond(A)|** | **ZZ(A)** |
| **q(A)** | 0.26 | -0.26 | -0.12 | 0.28 | 0.25 | -0.25 | -0.11 | 0.31 | 0.26 | -0.26 | -0.14 | 0.30 | 0.25 | -0.25 | -0.14 | 0.40 |
| **L(A)** | 0.07 | -0.07 | -0.16 | 0.19 | -0.35 | 0.35 | -0.36 | 0.38 | 0.03 | -0.03 | -0.16 | 0.13 | -0.08 | 0.08 | 0.10 | 0.00 |
| **K(A)** | 1.00 | -1.00 | 0.56 | -0.17 | 1.00 | -1.00 | 0.33 | -0.13 | 1.00 | -1.00 | 0.57 | -0.03 | 1.00 | -1.00 | 0.30 | 0.35 |
| KScaled(A) | -1.00 | 1.00 | -0.56 | 0.17 | -1.00 | 1.00 | -0.33 | 0.13 | -1.00 | 1.00 | -0.57 | 0.03 | -1.00 | 1.00 | -0.30 | -0.35 |
| **Ee(A)** | -1.00 | 1.00 | -0.56 | 0.17 | -1.00 | 1.00 | -0.33 | 0.13 | -1.00 | 1.00 | -0.57 | 0.03 | -1.00 | 1.00 | -0.30 | -0.35 |
| Intra(A)| | 0.11 | -0.11 | 0.52 | -0.06 | 0.11 | -0.11 | 0.75 | -0.13 | 0.13 | -0.13 | 0.52 | -0.05 | 0.13 | -0.13 | 0.73 | -0.07 |
| Bond(A)| | 0.56 | -0.56 | 1.00 | -0.57 | 0.33 | -0.33 | 1.00 | -0.54 | 0.57 | -0.57 | 1.00 | -0.48 | 0.30 | -0.30 | 1.00 | -0.38 |
| (A)| | 0.64 | -0.64 | 0.69 | -0.66 | 0.53 | -0.53 | 0.63 | -0.60 | 0.63 | -0.63 | 0.66 | -0.52 | 0.43 | -0.43 | 0.62 | -0.38 |
| N(A) | 0.89 | -0.89 | 0.77 | -0.56 | 0.90 | -0.90 | 0.61 | -0.51 | 0.88 | -0.88 | 0.77 | -0.46 | 0.89 | -0.89 | 0.58 | -0.09 |
| ****(A) | 0.90 | -0.90 | 0.76 | -0.56 | 0.91 | -0.91 | 0.59 | -0.49 | 0.90 | -0.90 | 0.77 | -0.44 | 0.91 | -0.91 | 0.56 | -0.05 |
| %****(A) | 0.45 | -0.45 | 0.79 | -0.83 | 0.40 | -0.40 | 0.72 | -0.79 | 0.44 | -0.44 | 0.76 | -0.79 | 0.40 | -0.40 | 0.69 | -0.59 |
| ****(A,A') | 0.33 | -0.33 | 0.46 | -0.30 | 0.33 | -0.33 | 0.51 | -0.47 | 0.30 | -0.30 | 0.43 | -0.35 | 0.30 | -0.30 | 0.45 | -0.39 |
| %****(A,A') | -0.45 | 0.45 | -0.79 | 0.83 | -0.40 | 0.40 | -0.72 | 0.79 | -0.44 | 0.44 | -0.76 | 0.79 | -0.40 | 0.40 | -0.69 | 0.59 |
| Vol(A) | 0.29 | -0.29 | 0.65 | -0.94 | 0.34 | -0.34 | 0.61 | -0.90 | 0.31 | -0.31 | 0.66 | -0.87 | 0.35 | -0.35 | 0.62 | -0.65 |
| **** | -0.17 | 0.17 | -0.57 | 1.00 | -0.13 | 0.13 | -0.54 | 1.00 | -0.03 | 0.03 | -0.48 | 1.00 | 0.35 | -0.35 | -0.38 | 1.00 |

Table S5: The sum total of the computed atomic properties over all the atoms in complexes **1**, **2**, **3** and **4**  fromDGDVZP(Ru)|6-31+G(d,p) systems.

|  | **q(A)** | **L(A)** | **K(A)** | **KScaled(A)** | **Ee(A)** | Intra(A)| | Bond(A)| | (A)| | N(A) | (A) | **%(A)** | **(A,A')** | **(A,A')** | Vol(A) | ZZ(A) |
| --- | --- | --- | --- | --- | --- | --- | --- | --- | --- | --- | --- | --- | --- | --- | --- |
| 1 | 0.00 | -1.05E-03 | 6,322.29 | -6,337.02 | -6,322.29 | 10.42 | 12.09 | 10.96 | 204.00 | 158.50 | 58.48 | 45.50 | 41.52 | 2,541.90 | -203.44 |
| 2 | 1.00 | -6.96E-04 | 5,938.65 | -5,953.02 | -5,938.65 | 10.31 | 11.75 | 8.82 | 196.00 | 149.67 | 55.94 | 46.33 | 44.06 | 2,439.26 | -190.77 |
| 3 | 0.00 | -1.14E-03 | 6,478.23 | -6,494.30 | -6,478.23 | 11.73 | 12.20 | 12.53 | 236.00 | 177.64 | 56.73 | 58.36 | 43.27 | 3,156.67 | -247.30 |
| 4 | 1.00 | 1.82E-03 | 6,094.61 | -6,110.31 | -6,094.61 | 11.71 | 11.61 | 10.45 | 228.00 | 168.84 | 54.86 | 59.16 | 45.14 | 3,058.97 | -219.51 |
